# Supplementary material
Source: publisher site journal article supplement (https://www.dovepress.com/article/407113)
Supplement: Supplementary file 1 [file get_supplementary_file.php]

```

FACTOR
/VARIABLES Q1 Q2 Q3 Q4 Q5 Q6 Q7 Q8 Q9 Q10 Q11 Q12 Q13 Q14 Q15 Q16 Q17 Q18 Q19 Q20 Q21 Q22
/MISSING LISTWISE
/ANALYSIS Q1 Q2 Q3 Q4 Q5 Q6 Q7 Q8 Q9 Q10 Q11 Q12 Q13 Q14 Q15 Q16 Q17 Q18 Q19 Q20 Q21 Q22 Q
/PRINT INITIAL KMO EXTRACTION
/CRITERIA MINEIGEN(1) ITERATE(25)
/EXTRACTION PC
/ROTATION NOROTATE
/METHOD=CORRELATION.

```

## Factor Analysis

### Notes

|                        |                                |                                                                                       |
|------------------------|--------------------------------|---------------------------------------------------------------------------------------|
| Output Created         |                                | 21-FEB-2023 10:02:59                                                                  |
| Comments               |                                |                                                                                       |
| Input                  | Data                           | C:<br>\Users\GF\Desktop\Cronbach's alpha value.sav                                    |
|                        | Active Dataset                 | 1                                                                                     |
|                        | Filter                         | <none>                                                                                |
|                        | Weight                         | <none>                                                                                |
|                        | Split File                     | <none>                                                                                |
|                        | N of Rows in Working Data File | 2210                                                                                  |
| Missing Value Handling | Definition of Missing          | MISSING=EXCLUDE:<br>User-defined missing values are treated as missing.               |
|                        | Cases Used                     | LISTWISE: Statistics are based on cases with no missing values for any variable used. |

**Notes**

|           |                                                                                                                                                                                                                                                                                                                                                                                           |                       |
|-----------|-------------------------------------------------------------------------------------------------------------------------------------------------------------------------------------------------------------------------------------------------------------------------------------------------------------------------------------------------------------------------------------------|-----------------------|
| Syntax    | <pre> FACTOR /VARIABLES Q1 Q2 Q3 Q4 Q5 Q6 Q7 Q8 Q9 Q10 Q11 Q12 Q13 Q14 Q15 Q16 Q17 Q18 Q19 Q20 Q21 Q22 Q23 Q24 Q25 Q26 Q27 /MISSING LISTWISE /ANALYSIS Q1 Q2 Q3 Q4 Q5 Q6 Q7 Q8 Q9 Q10 Q11 Q12 Q13 Q14 Q15 Q16 Q17 Q18 Q19 Q20 Q21 Q22 Q23 Q24 Q25 Q26 Q27 /PRINT INITIAL KMO EXTRACTION /CRITERIA MINEIGEN(1) ITERATE(25) /EXTRACTION PC /ROTATION NOROTATE  /METHOD=CORRELATIO N. </pre> |                       |
| Resources | Processor Time                                                                                                                                                                                                                                                                                                                                                                            | 00:00:00.02           |
|           | Elapsed Time                                                                                                                                                                                                                                                                                                                                                                              | 00:00:00.04           |
|           | Maximum Memory<br>Required                                                                                                                                                                                                                                                                                                                                                                | 85764 (83.754K) bytes |

[1] C:\Users\GF\Desktop\Cronbach's alpha value.sav

**KMO and Bartlett's Test**

|                                                  |                    |           |
|--------------------------------------------------|--------------------|-----------|
| Kaiser-Meyer-Olkin Measure of Sampling Adequacy. |                    | .847      |
| Bartlett's Test of Sphericity                    | Approx. Chi-Square | 13473.677 |
|                                                  | df                 | 351       |
|                                                  | Sig.               | .000      |

### Communalities

|     | Initial | Extraction |
|-----|---------|------------|
| Q1  | 1.000   | .633       |
| Q2  | 1.000   | .425       |
| Q3  | 1.000   | .557       |
| Q4  | 1.000   | .678       |
| Q5  | 1.000   | .661       |
| Q6  | 1.000   | .710       |
| Q7  | 1.000   | .543       |
| Q8  | 1.000   | .519       |
| Q9  | 1.000   | .456       |
| Q10 | 1.000   | .598       |
| Q11 | 1.000   | .454       |
| Q12 | 1.000   | .695       |
| Q13 | 1.000   | .289       |
| Q14 | 1.000   | .621       |
| Q15 | 1.000   | .479       |
| Q16 | 1.000   | .631       |
| Q17 | 1.000   | .535       |
| Q18 | 1.000   | .600       |
| Q19 | 1.000   | .601       |
| Q20 | 1.000   | .519       |
| Q21 | 1.000   | .715       |
| Q22 | 1.000   | .714       |
| Q23 | 1.000   | .576       |
| Q24 | 1.000   | .564       |
| Q25 | 1.000   | .725       |
| Q26 | 1.000   | .478       |
| Q27 | 1.000   | .628       |

Extraction Method: Principal  
Component Analysis.

**Total Variance Explained**

| Component | Initial Eigenvalues |               |              | Extraction Sums of Squared |               |
|-----------|---------------------|---------------|--------------|----------------------------|---------------|
|           | Total               | % of Variance | Cumulative % | Total                      | % of Variance |
| 1         | 6.059               | 22.439        | 22.439       | 6.059                      | 22.439        |
| 2         | 2.575               | 9.538         | 31.977       | 2.575                      | 9.538         |
| 3         | 2.147               | 7.952         | 39.929       | 2.147                      | 7.952         |
| 4         | 1.384               | 5.126         | 45.055       | 1.384                      | 5.126         |
| 5         | 1.278               | 4.735         | 49.790       | 1.278                      | 4.735         |
| 6         | 1.104               | 4.087         | 53.878       | 1.104                      | 4.087         |
| 7         | 1.057               | 3.915         | 57.792       | 1.057                      | 3.915         |
| 8         | .960                | 3.555         | 61.347       |                            |               |
| 9         | .895                | 3.313         | 64.660       |                            |               |
| 10        | .866                | 3.207         | 67.867       |                            |               |
| 11        | .831                | 3.076         | 70.943       |                            |               |
| 12        | .788                | 2.920         | 73.863       |                            |               |
| 13        | .740                | 2.742         | 76.605       |                            |               |
| 14        | .704                | 2.608         | 79.213       |                            |               |
| 15        | .637                | 2.358         | 81.572       |                            |               |
| 16        | .575                | 2.131         | 83.702       |                            |               |
| 17        | .558                | 2.066         | 85.769       |                            |               |
| 18        | .523                | 1.936         | 87.704       |                            |               |
| 19        | .487                | 1.803         | 89.508       |                            |               |
| 20        | .453                | 1.678         | 91.185       |                            |               |
| 21        | .440                | 1.629         | 92.814       |                            |               |
| 22        | .399                | 1.478         | 94.292       |                            |               |
| 23        | .394                | 1.459         | 95.751       |                            |               |
| 24        | .349                | 1.293         | 97.044       |                            |               |
| 25        | .290                | 1.073         | 98.117       |                            |               |
| 26        | .282                | 1.043         | 99.160       |                            |               |
| 27        | .227                | .840          | 100.000      |                            |               |

### Total Variance Explained

| Component | Extraction ... |
|-----------|----------------|
|           | Cumulative %   |
| 1         | 22.439         |
| 2         | 31.977         |
| 3         | 39.929         |
| 4         | 45.055         |
| 5         | 49.790         |
| 6         | 53.878         |
| 7         | 57.792         |
| 8         |                |
| 9         |                |
| 10        |                |
| 11        |                |
| 12        |                |
| 13        |                |
| 14        |                |
| 15        |                |
| 16        |                |
| 17        |                |
| 18        |                |
| 19        |                |
| 20        |                |
| 21        |                |
| 22        |                |
| 23        |                |
| 24        |                |
| 25        |                |
| 26        |                |
| 27        |                |

Extraction Method: Principal Component Analysis.

Component Matrix<sup>a</sup>

|     | Component |       |       |       |       |       |       |
|-----|-----------|-------|-------|-------|-------|-------|-------|
|     | 1         | 2     | 3     | 4     | 5     | 6     | 7     |
| Q1  | .558      | .470  | -.113 | -.117 | -.152 | .039  | -.223 |
| Q2  | .194      | .200  | .091  | .133  | -.168 | .542  | -.007 |
| Q3  | .500      | .407  | -.143 | -.014 | -.002 | .178  | -.299 |
| Q4  | .695      | -.222 | -.216 | -.182 | .200  | .123  | -.102 |
| Q5  | .518      | -.267 | -.082 | -.413 | .339  | .157  | -.066 |
| Q6  | .225      | .024  | .596  | -.453 | .311  | .026  | .017  |
| Q7  | .403      | -.047 | .494  | -.179 | .266  | -.173 | .045  |
| Q8  | .571      | -.225 | -.106 | .307  | .163  | -.028 | .092  |
| Q9  | .569      | -.168 | .220  | .151  | .102  | -.131 | .075  |
| Q10 | .017      | -.018 | .058  | .200  | .155  | .718  | -.121 |
| Q11 | .353      | .385  | -.051 | -.220 | -.224 | -.180 | .217  |
| Q12 | .122      | .197  | .114  | -.036 | -.145 | .254  | .736  |
| Q13 | .074      | .257  | -.081 | .242  | .302  | .026  | .246  |
| Q14 | .315      | .406  | -.223 | .276  | .457  | -.110 | .105  |
| Q15 | .227      | .436  | -.162 | .211  | .190  | -.183 | -.310 |
| Q16 | .551      | .532  | -.053 | -.112 | -.147 | -.033 | -.082 |
| Q17 | .482      | .486  | -.107 | -.002 | .153  | -.053 | .170  |
| Q18 | .495      | .499  | .035  | -.171 | -.261 | -.004 | .081  |
| Q19 | .562      | -.201 | -.047 | .397  | .239  | -.040 | .165  |
| Q20 | .568      | -.224 | .134  | -.332 | .076  | .114  | .003  |
| Q21 | -.026     | .218  | .775  | .237  | -.068 | -.010 | -.065 |
| Q22 | .738      | -.366 | -.078 | .038  | -.162 | -.034 | .011  |
| Q23 | .161      | .079  | .633  | .312  | -.056 | -.025 | -.204 |
| Q24 | .534      | -.102 | .441  | .159  | -.211 | -.058 | -.024 |
| Q25 | .740      | -.355 | -.147 | .033  | -.163 | -.030 | -.024 |
| Q26 | .599      | -.260 | -.001 | .115  | -.184 | -.070 | -.005 |
| Q27 | .604      | -.296 | -.179 | .146  | -.349 | -.009 | .007  |

Extraction Method: Principal Component Analysis.

a. 7 components extracted.

```
RELIABILITY
/VARIABLES=Q1 Q2 Q3 Q4 Q5 Q6 Q7 Q8 Q9 Q10 Q11 Q12 Q13 Q14 Q15 Q16 Q17 Q18 Q19 Q20 Q21 Q22
/SCALE('ALL VARIABLES') ALL
/MODEL=ALPHA
/STATISTICS=DESCRIPTIVE SCALE CORR
/SUMMARY=TOTAL.
```

## Reliability

**Notes**

|                        |                                |                                                                                                                                                                                                                                          |
|------------------------|--------------------------------|------------------------------------------------------------------------------------------------------------------------------------------------------------------------------------------------------------------------------------------|
| Output Created         |                                | 21-FEB-2023 10:03:52                                                                                                                                                                                                                     |
| Comments               |                                |                                                                                                                                                                                                                                          |
| Input                  | Data                           | C:<br>\Users\GF\Desktop\Cronbach's alpha value.sav                                                                                                                                                                                       |
|                        | Active Dataset                 | 1                                                                                                                                                                                                                                        |
|                        | Filter                         | <none>                                                                                                                                                                                                                                   |
|                        | Weight                         | <none>                                                                                                                                                                                                                                   |
|                        | Split File                     | <none>                                                                                                                                                                                                                                   |
|                        | N of Rows in Working Data File | 2210                                                                                                                                                                                                                                     |
|                        | Matrix Input                   |                                                                                                                                                                                                                                          |
| Missing Value Handling | Definition of Missing          | User-defined missing values are treated as missing.                                                                                                                                                                                      |
|                        | Cases Used                     | Statistics are based on all cases with valid data for all variables in the procedure.                                                                                                                                                    |
| Syntax                 |                                | RELIABILITY<br>/VARIABLES=Q1 Q2 Q3 Q4 Q5 Q6 Q7 Q8 Q9 Q10 Q11 Q12 Q13 Q14 Q15 Q16 Q17 Q18 Q19 Q20 Q21 Q22 Q23 Q24 Q25 Q26 Q27<br>/SCALE('ALL VARIABLES') ALL<br>/MODEL=ALPHA<br><br>/STATISTICS=DESCRIPTIVE SCALE CORR<br>/SUMMARY=TOTAL. |
| Resources              | Processor Time                 | 00:00:00.00                                                                                                                                                                                                                              |
|                        | Elapsed Time                   | 00:00:00.02                                                                                                                                                                                                                              |

[1] C:\Users\GF\Desktop\Cronbach's alpha value.sav

**Scale: ALL VARIABLES**

**Case Processing Summary**

|       |                       | N    | %     |
|-------|-----------------------|------|-------|
| Cases | Valid                 | 1578 | 71.4  |
|       | Excluded <sup>a</sup> | 632  | 28.6  |
|       | Total                 | 2210 | 100.0 |

a. Listwise deletion based on all variables in the procedure.

### Reliability Statistics

| Cronbach's Alpha | Cronbach's Alpha Based on Standardized Items | N of Items |
|------------------|----------------------------------------------|------------|
| .802             | .836                                         | 27         |

### Item Statistics

|     | Mean | Std. Deviation | N    |
|-----|------|----------------|------|
| Q1  | 4.36 | .703           | 1578 |
| Q2  | 3.57 | 1.135          | 1578 |
| Q3  | 4.23 | .750           | 1578 |
| Q4  | 4.35 | .709           | 1578 |
| Q5  | 4.22 | .830           | 1578 |
| Q6  | 3.32 | 1.163          | 1578 |
| Q7  | 3.70 | .986           | 1578 |
| Q8  | 4.18 | .827           | 1578 |
| Q9  | 4.16 | .844           | 1578 |
| Q10 | 3.14 | 1.086          | 1578 |
| Q11 | 3.98 | .841           | 1578 |
| Q12 | 3.23 | 1.171          | 1578 |
| Q13 | 4.11 | .796           | 1578 |
| Q14 | 4.05 | .878           | 1578 |
| Q15 | 3.54 | 1.123          | 1578 |
| Q16 | 4.22 | .749           | 1578 |
| Q17 | 3.85 | 1.103          | 1578 |
| Q18 | 4.07 | .764           | 1578 |
| Q19 | 4.14 | .889           | 1578 |
| Q20 | 4.01 | .851           | 1578 |
| Q21 | 2.53 | 1.434          | 1578 |
| Q22 | 4.32 | .672           | 1578 |
| Q23 | 3.30 | 1.282          | 1578 |
| Q24 | 3.90 | .780           | 1578 |
| Q25 | 4.36 | .655           | 1578 |
| Q26 | 4.15 | .767           | 1578 |
| Q27 | 4.34 | .749           | 1578 |



**Inter-Item Correlation Matrix**

|     | Q1    | Q2    | Q3    | Q4    | Q5    | Q6    | Q7    | Q8    |
|-----|-------|-------|-------|-------|-------|-------|-------|-------|
| Q1  | 1.000 | .156  | .477  | .293  | .172  | .076  | .109  | .211  |
| Q2  | .156  | 1.000 | .174  | .061  | .009  | .041  | .043  | .068  |
| Q3  | .477  | .174  | 1.000 | .375  | .188  | .028  | .081  | .148  |
| Q4  | .293  | .061  | .375  | 1.000 | .597  | .111  | .212  | .398  |
| Q5  | .172  | .009  | .188  | .597  | 1.000 | .220  | .231  | .278  |
| Q6  | .076  | .041  | .028  | .111  | .220  | 1.000 | .417  | .023  |
| Q7  | .109  | .043  | .081  | .212  | .231  | .417  | 1.000 | .139  |
| Q8  | .211  | .068  | .148  | .398  | .278  | .023  | .139  | 1.000 |
| Q9  | .195  | .047  | .165  | .345  | .246  | .202  | .359  | .342  |
| Q10 | .014  | .080  | .039  | .027  | .027  | .007  | .006  | .039  |
| Q11 | .344  | .064  | .217  | .133  | .103  | .054  | .126  | .099  |
| Q12 | .054  | .073  | .062  | .007  | .016  | .061  | .023  | .000  |
| Q13 | .067  | .065  | .105  | .035  | -.028 | -.015 | .014  | .026  |
| Q14 | .273  | .074  | .260  | .155  | .115  | -.042 | .071  | .159  |
| Q15 | .264  | .045  | .270  | .068  | -.003 | -.021 | .030  | .090  |
| Q16 | .547  | .145  | .440  | .241  | .135  | .118  | .149  | .160  |
| Q17 | .381  | .112  | .339  | .272  | .125  | .093  | .158  | .213  |
| Q18 | .495  | .187  | .354  | .189  | .109  | .136  | .164  | .126  |
| Q19 | .116  | .079  | .174  | .360  | .215  | .023  | .168  | .558  |
| Q20 | .224  | .087  | .167  | .381  | .437  | .351  | .211  | .271  |
| Q21 | .007  | .099  | -.015 | -.211 | -.150 | .280  | .228  | -.040 |
| Q22 | .272  | .091  | .201  | .542  | .367  | .089  | .280  | .447  |
| Q23 | .074  | .062  | .095  | -.004 | .003  | .177  | .162  | .032  |
| Q24 | .180  | .117  | .172  | .221  | .122  | .230  | .333  | .256  |
| Q25 | .280  | .067  | .240  | .587  | .416  | .013  | .225  | .418  |
| Q26 | .201  | .072  | .148  | .371  | .238  | .023  | .251  | .297  |
| Q27 | .217  | .074  | .197  | .396  | .253  | -.069 | .048  | .364  |

**Inter-Item Correlation Matrix**

|     | Q9    | Q10   | Q11   | Q12   | Q13   | Q14   | Q15   | Q16   |
|-----|-------|-------|-------|-------|-------|-------|-------|-------|
| Q1  | .195  | .014  | .344  | .054  | .067  | .273  | .264  | .547  |
| Q2  | .047  | .080  | .064  | .073  | .065  | .074  | .045  | .145  |
| Q3  | .165  | .039  | .217  | .062  | .105  | .260  | .270  | .440  |
| Q4  | .345  | .027  | .133  | .007  | .035  | .155  | .068  | .241  |
| Q5  | .246  | .027  | .103  | .016  | -.028 | .115  | -.003 | .135  |
| Q6  | .202  | .007  | .054  | .061  | -.015 | -.042 | -.021 | .118  |
| Q7  | .359  | .006  | .126  | .023  | .014  | .071  | .030  | .149  |
| Q8  | .342  | .039  | .099  | .000  | .026  | .159  | .090  | .160  |
| Q9  | 1.000 | .014  | .109  | .065  | -.007 | .150  | .036  | .209  |
| Q10 | .014  | 1.000 | -.076 | .040  | .015  | .006  | .002  | -.009 |
| Q11 | .109  | -.076 | 1.000 | .135  | .066  | .153  | .129  | .368  |
| Q12 | .065  | .040  | .135  | 1.000 | .039  | .077  | -.015 | .113  |
| Q13 | -.007 | .015  | .066  | .039  | 1.000 | .214  | .096  | .088  |
| Q14 | .150  | .006  | .153  | .077  | .214  | 1.000 | .327  | .254  |
| Q15 | .036  | .002  | .129  | -.015 | .096  | .327  | 1.000 | .299  |
| Q16 | .209  | -.009 | .368  | .113  | .088  | .254  | .299  | 1.000 |
| Q17 | .158  | -.015 | .261  | .161  | .121  | .396  | .248  | .469  |
| Q18 | .173  | -.045 | .372  | .162  | .087  | .168  | .171  | .515  |
| Q19 | .385  | .047  | .082  | .026  | .056  | .244  | .088  | .156  |
| Q20 | .251  | -.002 | .130  | .048  | -.045 | .031  | .005  | .205  |
| Q21 | .052  | .041  | .003  | .089  | -.001 | -.059 | -.002 | .043  |
| Q22 | .370  | -.016 | .133  | .040  | -.009 | .056  | .048  | .229  |
| Q23 | .229  | .039  | .019  | .031  | .012  | .007  | .004  | .063  |
| Q24 | .332  | .013  | .106  | .094  | .005  | .030  | .086  | .207  |
| Q25 | .416  | -.013 | .139  | .039  | -.004 | .090  | .043  | .235  |
| Q26 | .247  | .014  | .126  | .005  | .024  | .107  | .036  | .188  |
| Q27 | .407  | .008  | .136  | .036  | -.053 | .035  | .041  | .228  |

**Inter-Item Correlation Matrix**

|     | Q17   | Q18   | Q19   | Q20   | Q21   | Q22   | Q23   | Q24   |
|-----|-------|-------|-------|-------|-------|-------|-------|-------|
| Q1  | .381  | .495  | .116  | .224  | .007  | .272  | .074  | .180  |
| Q2  | .112  | .187  | .079  | .087  | .099  | .091  | .062  | .117  |
| Q3  | .339  | .354  | .174  | .167  | -.015 | .201  | .095  | .172  |
| Q4  | .272  | .189  | .360  | .381  | -.211 | .542  | -.004 | .221  |
| Q5  | .125  | .109  | .215  | .437  | -.150 | .367  | .003  | .122  |
| Q6  | .093  | .136  | .023  | .351  | .280  | .089  | .177  | .230  |
| Q7  | .158  | .164  | .168  | .211  | .228  | .280  | .162  | .333  |
| Q8  | .213  | .126  | .558  | .271  | -.040 | .447  | .032  | .256  |
| Q9  | .158  | .173  | .385  | .251  | .052  | .370  | .229  | .332  |
| Q10 | -.015 | -.045 | .047  | -.002 | .041  | -.016 | .039  | .013  |
| Q11 | .261  | .372  | .082  | .130  | .003  | .133  | .019  | .106  |
| Q12 | .161  | .162  | .026  | .048  | .089  | .040  | .031  | .094  |
| Q13 | .121  | .087  | .056  | -.045 | -.001 | -.009 | .012  | .005  |
| Q14 | .396  | .168  | .244  | .031  | -.059 | .056  | .007  | .030  |
| Q15 | .248  | .171  | .088  | .005  | -.002 | .048  | .004  | .086  |
| Q16 | .469  | .515  | .156  | .205  | .043  | .229  | .063  | .207  |
| Q17 | 1.000 | .423  | .218  | .152  | .011  | .162  | .019  | .135  |
| Q18 | .423  | 1.000 | .129  | .181  | .070  | .200  | .078  | .216  |
| Q19 | .218  | .129  | 1.000 | .315  | -.025 | .431  | .097  | .251  |
| Q20 | .152  | .181  | .315  | 1.000 | -.056 | .411  | .055  | .370  |
| Q21 | .011  | .070  | -.025 | -.056 | 1.000 | -.122 | .510  | .282  |
| Q22 | .162  | .200  | .431  | .411  | -.122 | 1.000 | .049  | .386  |
| Q23 | .019  | .078  | .097  | .055  | .510  | .049  | 1.000 | .280  |
| Q24 | .135  | .216  | .251  | .370  | .282  | .386  | .280  | 1.000 |
| Q25 | .181  | .197  | .365  | .371  | -.194 | .726  | .072  | .386  |
| Q26 | .157  | .200  | .330  | .356  | -.035 | .546  | .100  | .365  |
| Q27 | .139  | .183  | .325  | .303  | -.124 | .591  | -.016 | .353  |

**Inter-Item Correlation Matrix**

|     | Q25   | Q26   | Q27   |
|-----|-------|-------|-------|
| Q1  | .280  | .201  | .217  |
| Q2  | .067  | .072  | .074  |
| Q3  | .240  | .148  | .197  |
| Q4  | .587  | .371  | .396  |
| Q5  | .416  | .238  | .253  |
| Q6  | .013  | .023  | -.069 |
| Q7  | .225  | .251  | .048  |
| Q8  | .418  | .297  | .364  |
| Q9  | .416  | .247  | .407  |
| Q10 | -.013 | .014  | .008  |
| Q11 | .139  | .126  | .136  |
| Q12 | .039  | .005  | .036  |
| Q13 | -.004 | .024  | -.053 |
| Q14 | .090  | .107  | .035  |
| Q15 | .043  | .036  | .041  |
| Q16 | .235  | .188  | .228  |
| Q17 | .181  | .157  | .139  |
| Q18 | .197  | .200  | .183  |
| Q19 | .365  | .330  | .325  |
| Q20 | .371  | .356  | .303  |
| Q21 | -.194 | -.035 | -.124 |
| Q22 | .726  | .546  | .591  |
| Q23 | .072  | .100  | -.016 |
| Q24 | .386  | .365  | .353  |
| Q25 | 1.000 | .580  | .555  |
| Q26 | .580  | 1.000 | .385  |
| Q27 | .555  | .385  | 1.000 |

**Item-Total Statistics**

|     | Scale Mean if Item Deleted | Scale Variance if Item Deleted | Corrected Item-Total Correlation | Squared Multiple Correlation | Cronbach's Alpha if Item Deleted |
|-----|----------------------------|--------------------------------|----------------------------------|------------------------------|----------------------------------|
| Q1  | 100.97                     | 95.496                         | .492                             | .466                         | .791                             |
| Q2  | 101.76                     | 97.113                         | .195                             | .075                         | .803                             |
| Q3  | 101.10                     | 95.741                         | .440                             | .372                         | .792                             |
| Q4  | 100.98                     | 95.349                         | .498                             | .582                         | .790                             |
| Q5  | 101.11                     | 96.276                         | .356                             | .454                         | .795                             |
| Q6  | 102.01                     | 95.609                         | .255                             | .369                         | .800                             |
| Q7  | 101.62                     | 94.332                         | .389                             | .370                         | .793                             |
| Q8  | 101.15                     | 95.246                         | .423                             | .409                         | .792                             |
| Q9  | 101.17                     | 94.197                         | .479                             | .404                         | .790                             |
| Q10 | 102.19                     | 100.851                        | .033                             | .031                         | .811                             |
| Q11 | 101.35                     | 97.088                         | .299                             | .214                         | .797                             |
| Q12 | 102.10                     | 98.227                         | .136                             | .076                         | .807                             |
| Q13 | 101.22                     | 100.703                        | .089                             | .066                         | .805                             |
| Q14 | 101.28                     | 96.942                         | .292                             | .309                         | .797                             |
| Q15 | 101.79                     | 97.114                         | .198                             | .195                         | .803                             |
| Q16 | 101.11                     | 94.748                         | .510                             | .471                         | .789                             |
| Q17 | 101.48                     | 92.205                         | .440                             | .382                         | .790                             |
| Q18 | 101.26                     | 95.249                         | .464                             | .410                         | .791                             |
| Q19 | 101.19                     | 94.393                         | .438                             | .441                         | .791                             |
| Q20 | 101.32                     | 94.773                         | .438                             | .428                         | .791                             |
| Q21 | 102.80                     | 97.649                         | .108                             | .450                         | .813                             |
| Q22 | 101.01                     | 95.313                         | .532                             | .649                         | .790                             |
| Q23 | 102.02                     | 95.343                         | .230                             | .341                         | .803                             |
| Q24 | 101.43                     | 94.500                         | .504                             | .414                         | .789                             |
| Q25 | 100.97                     | 95.703                         | .516                             | .668                         | .790                             |
| Q26 | 101.17                     | 95.622                         | .436                             | .427                         | .792                             |
| Q27 | 100.98                     | 96.456                         | .390                             | .492                         | .794                             |

**Scale Statistics**

| Mean   | Variance | Std. Deviation | N of Items |
|--------|----------|----------------|------------|
| 105.33 | 102.754  | 10.137         | 27         |
